# Supplementary material for: A salt-rejecting anisotropic structure for efficient solar desalination via heat–mass flux decoupling
Source: Royal Society of Chemistry journal article supplement (doi:10.1039/d0ta04326e), 2020-01-01
Supplement: d0ta04326e1.pdf [file d0ta04326e1.pdf]

1

2

3

4

5

6

7

8

## Supplementary Information

9

### **Salt-rejecting Anisotropic Structure for Efficient Solar Desalination via Heat-mass Flux Decoupling**

12

13

14 **This PDF file includes:**

15 **Section S1** Characterization of materials

16 **Section S2** Efficiency and energy conservation calculation

17 **Section S3** Water and salt transfer path identification

18 **Section S4** Numerical simulation setups

19 **Section S5** Solar desalination tests

20 **Fig. S1** Schematic diagram of different ALSs.

21 **Fig. S2** XPS spectrum of sugarcane after hydrothermal and pyrolyzation of different  
22 temperatures.

23 **Fig. S3** FT-IR image and UV-vis spectrum of sugarcane after hydrothermal and pyrolyzation of

24 different temperatures.

25 **Fig. S4** Schematic diagram of solar desalination setups and infrared images of solar evaporation  
26 **process.**

27 **Fig. S5** Hypsometric map of solar evaporation performance.

28 **Fig. S6** Digital photos of water flux direction test.

29 **Fig. S7** Geometric setups of finite simulation models.

30 **Fig. S8** Schematic diagram of heat transfer process within HSI after 20 ms.

31 **Fig. S9** Schematic diagram of heat transfer process within VSI after 20 ms.

32 **Fig. S10** Schematic diagram of heat transfer process within VSI after 20 ms.

33 **Fig. S11** Images of VSI surface after 1-hr solar desalination.

34 **Table S1** Literature Comparisons.

35

36

## 37 **S1. Characterization**

38 Since the anisotropy was closely related to the micro-structure, we prepared the sugarcane-  
39 derived anisotropic structure in different ways according to the growth direction (Fig. S1): (1)  
40 horizontally (perpendicular to the growth direction) cut sugarcane internodes (HSI- $x$ ), (2)  
41 vertically (parallel to the growth direction) cut sugarcane internodes (VSI- $x$ ), (3) horizontally cut  
42 sugarcane nodes (HSN- $x$ ), where  $x$  represents the pyrolysis temperatures of 400, 700, 900 °C  
43 respectively. Among the aforesaid three types structures, HSI and HSN shared similar vertically  
44 penetrated structures while VSI was horizontally penetrated.

45 Surface elemental analyses by X-ray photoelectron spectroscopy (XPS) showed that  
46 hydrothermal treatment had preliminarily carbonized the sugarcane (Fig. S2a). Following  
47 calcination and higher calcination temperatures further lowered the O element (both C=O and C-  
48 O) percentage, and C-C dominated the composition of VSI, HSI and HSN (Fig. S2c-d).  
49 Consistently, FT-IR spectrum also showed that three different structures after hydrothermal  
50 treatment still showed -OH, -C=O and -C-O vibrations while -OH vibration disappeared after  
51 pyrolysis (Fig. S3a). Moreover, ALS-900 only exhibited strong absorption in fingerprint area and  
52 no -OH vibration was detected.

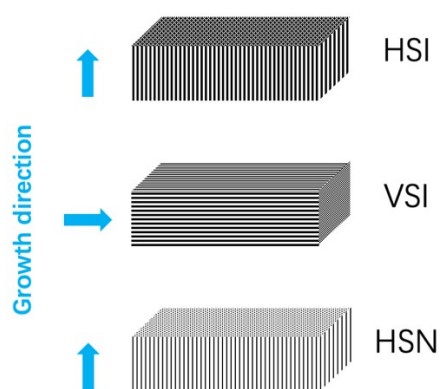

53

54 **Fig. S1** Schematic diagram of different ALSs.

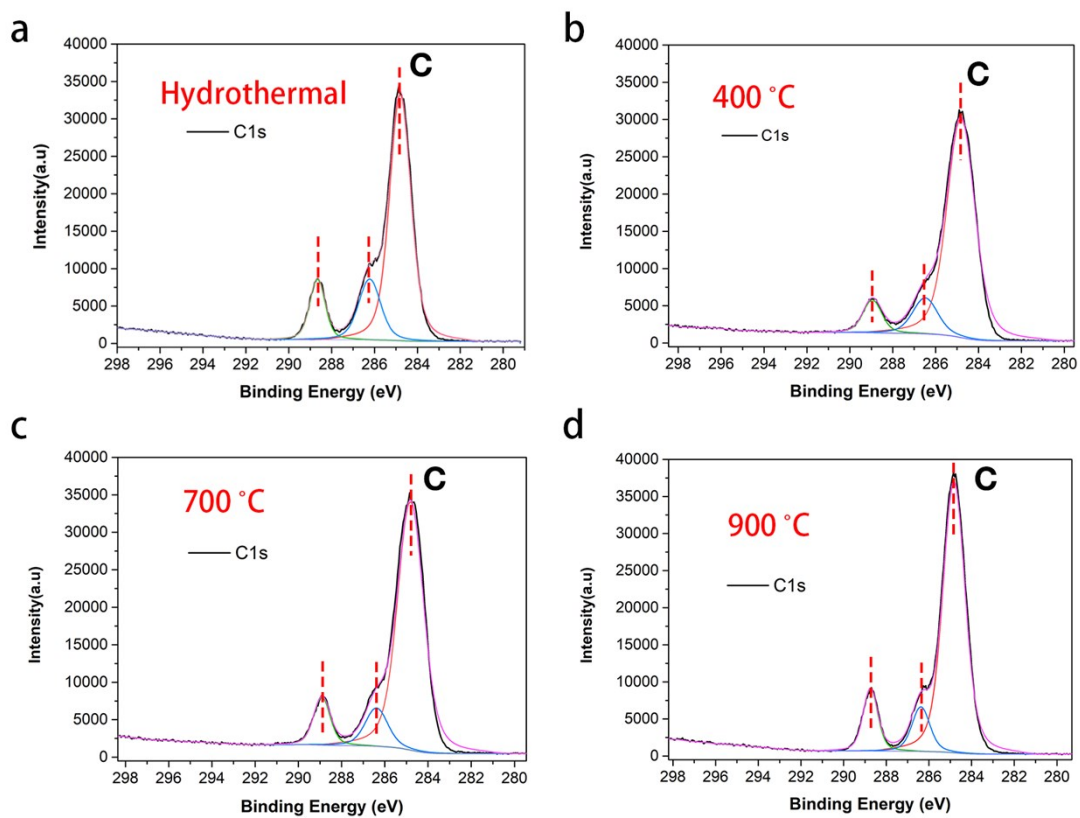

55

56 **Fig. S2** XPS spectrum of sugarcane after hydrothermal and pyrolyzation of different  
 57 temperatures.

58

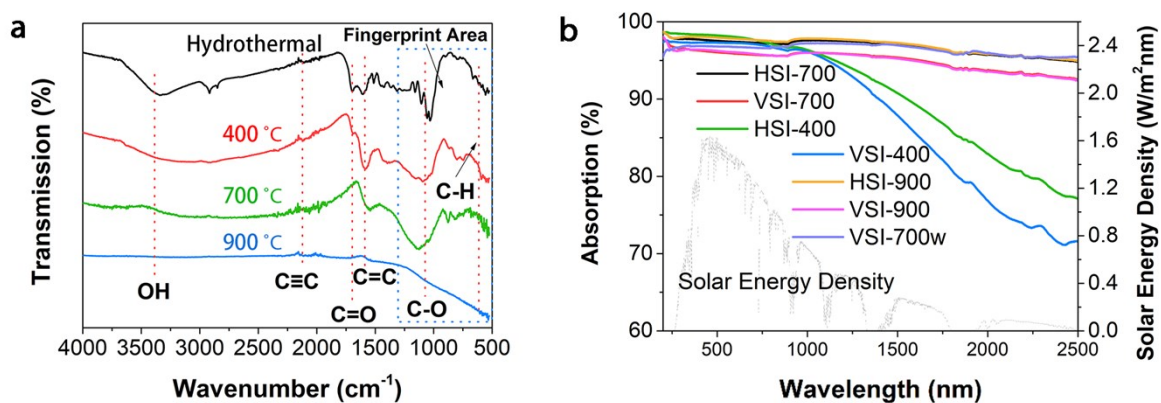

59

60 **Fig. S3** a) FT-IR image of sugarcane after hydrothermal and pyrolyzation of different  
 61 temperatures. b) UV-vis spectrum of VSI, HSI and HSN.

62

63 **S2. Efficiency and energy conservation calculation**

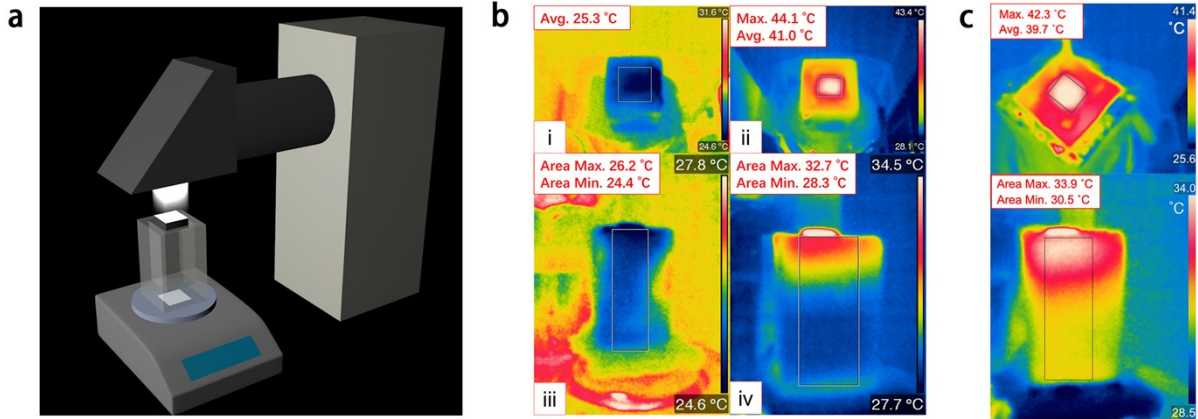

64

65 **Fig. S4** Characterization of the solar steam generation efficiency of VSI-700 and HSI-700. (a)  
 66 Schematic diagram of solar desalination setups and (b) Infrared images of solar evaporation  
 67 process for VSI-700 (i and ii, the sugarcane surface; iii and iv, profile of bulk water before and  
 68 after 1-hour one sun irradiance, respectively). (c) Infrared images of solar evaporation process  
 69 for HSI-700 after 1-hour one sun irradiance.

70

71 According the equation of phase-change enthalpy ( $h_{pc} = 1918.46 \times [T/(T-33.91)]^2$  kJ kg<sup>-1</sup>) and  
 72 the average surface temperature (41 °C) shown in Fig. S4,

$$73 \quad h_{pc \ 41^\circ\text{C}} = 1918.46 \times \left( \frac{314.15}{314.15 - 33.91} \right)^2 = 2410 \text{ kJ kg}^{-1}$$

74 The efficiency of VSI-700 can be calculated as:

$$75 \quad \eta_{\text{evp}} \% = \frac{\dot{m}(h_s + h_{pc})}{q_{\text{solar}}} \% = \frac{(\dot{m}_{\text{obs}} - \dot{m}_{\text{background}}) \times (h_s + h_{pc})}{q_{\text{solar}}} = \frac{(1.05 \pm 0.05) \times 4}{1 \times 30} = 86.5\% \pm 4\%$$

76 To verify the energy conservation, the heat loss in different forms are listed as follows:

$$77 \quad \dot{m}h_{\text{LV}} = \alpha q_{\text{solar}} - \varepsilon\sigma(T^4 - T_\infty^4) - h(T - T_\infty) - q_{\text{water}}$$

78

### 79 **S2.1 Light absorbing loss**

80 Light absorbing process defines the total heat energy input of the system. According to the UV-  
81 Vis spectrum of aerogel-like sugarcane carbon, light absorbance is ~97%. So  $\alpha q_{\text{solar}} > 970 \text{ W/m}^2$ ,  
82 and it accounts for 3% of total energy.

### 83 **S2.2 Radiative heat loss**

84 For radiative heat loss, T is defined as the average temperature of evaporation surface (41 °C),  
85 and  $T_{\infty}$  is the temperature of air above VSI. However, VSI surface is surrounded with hot water  
86 vapor,<sup>1</sup> which is measured to be ~ 38.2 °C. It prevents it from direct contact with cold air (26 °C).  
87 According to Kirchhoff law,  $\epsilon$  is defined as 0.97, then radiative heat loss is estimated to account  
88 for 1.9% of total energy.

### 89 **S2.3 Convective heat loss**

90 For convection heat loss, heat transfer coefficient h is calculated as follows:

$$91 \quad h = \frac{C \cdot Ra^n}{D} \cdot \lambda$$

$$92 \quad Ra = Gr \cdot Pr = \frac{Gr \cdot \beta \cdot g \cdot \rho^2 \cdot D^3 \cdot \Delta T}{\mu^2}$$

93 Gr is the Grashof number of the air, C and n are coefficients, g is gravity constant,  $\rho$  is the density  
94 of air,  $\mu$  represents the dynamic viscosity of air, D is the characteristic size of material,  $\Delta T$   
95 represents the temperature differences between the evaporation surface and the ambient air.  
96 During the evaporation process, the water vapor (38.2 °C) generated and will directly heated up  
97 the air above the material and hinder the cold air (26 °C) from getting close to the evaporation  
98 surface to get heated.<sup>1,2</sup> Thus, the convective heat loss was greatly minimized.

99 As a result,  $\Delta T$  is estimated as 2.8 K, thus  $h$  is estimated as  $7.55 \text{ W}/(\text{m}^2 \cdot \text{K})$ , and convective  
100 heat loss is calculated to account for 2.1% of total absorbed energy.

#### 101 **S2.4 Conductive heat loss**

102 Conduction heat loss is estimated by the temperature gradient in bulk water.

$$103 \quad q_{\text{water}} = k\Delta T/\Delta l$$

104  $A$  is the conduction area and  $k$  is the thermal conductivity of bulk water.  $\Delta T$  represents the  
105 temperature change of bulk water,  $\Delta l$  is the 20 mm. As monitored, the temperature changes of  
106 upper water and bulk water are 1.76 and 0.38 K. Thus, conductive heat loss is calculated to  
107 account for 4.5% of total energy.

108 In conclusion, all the energy loss sums up to be 11.5%, which is in well agreement with the  
109 calculated solar evaporation efficiency of  $86.5\% \pm 4\%$ .

110 Likewise, the energy balance of HSI-700 can be analyzed. The energy loss for HSI-700  
111 mainly comprised of 2.5% light absorbing loss, 1.9% radiative heat loss, 2.2% convective heat  
112 loss and 11.64% conductive heat loss, which summed up to be 18.24 % and agreed with the  
113 calculated evaporation efficiency of  $79.8\% \pm 1.2\%$ .

114 Therefore, the light absorbing loss, radiative loss and convective loss of VSI-700 and HSI-  
115 700 were similar. VSI effectively suppressed conductive heat loss to the bulk water, so its solar  
116 evaporation efficiency was elevated.

#### 117 **S2.5 Solar evaporation performance comparison**

118 To further clarify the tendencies, hypsometric maps as a function of both structure and  
119 composition were drawn. VSI-700 clearly emerged as the hot spot for solar evaporation (Fig.  
120 S5). Even though higher calcination temperatures led to better solar absorption (Fig. S5c), solar

121 evaporation performance still first increased and then decreased, proving that the utilization of  
122 absorbed energy within different structures governed the solar evaporation efficiency. Generally,  
123 higher calcination temperature led to a slight shrinkage of the ALS skeleton and thus a higher  
124 water content when floating on the water (Fig. S5b). Since optimal water content has been  
125 reported to be beneficial for heat management and solar evaporation,<sup>2-5</sup> the moderate water  
126 content of VSI is in accordance with its preferred solar evaporation performance when compared  
127 to HSI and HSN calcinated under the same temperature. However, the solar evaporation  
128 performance rose to a higher level with a much higher water content for VSI, indicating that a  
129 horizontally penetrated structure is a better option for solar evaporation than a vertically  
130 penetrated one (Fig. S5a). Specifically, beyond the influence of water content, the totally  
131 different ways of mass and energy transfer were inferred to account for the optimal solar  
132 evaporation performance of VSI.

133 Besides, both VSI and HSI with different sicknesses have been investigated. As shown in  
134 Fig. S5d, with the sickness increasing, the net evaporation rate of both VSI and HSI were boosted,  
135 indicating promoted solar evaporation efficiencies. Interestingly, the increasement of the net  
136 evaporation rate exhibited different features, where the increasements were less dramatic for VSI  
137 compared to that of HSI. As reported, thicker solar evaporators (thicker heat insulating layer) led  
138 to more efficient heat localization at the evaporation surface.<sup>6</sup> This suggested that the heat loss  
139 in VSI was better minimized than in HSI, so VSI did not rely on increasing its thickness to  
140 achieve better heat localization effect. In addition, no observable salt precipitated for all VSI and  
141 HSI samples with different samples, demonstrating efficient salt diffusion in them.

142



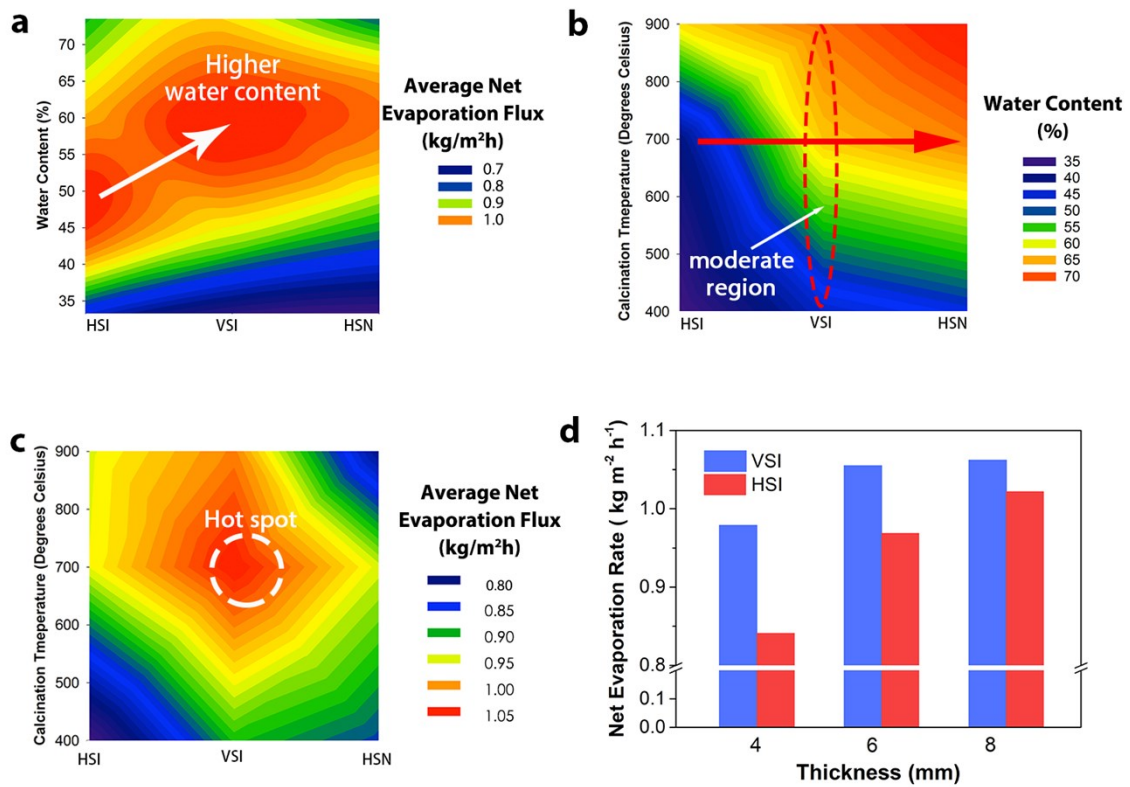

143

144 **Fig. S5** Comparisons between different anisotropic structures. (a) Solar evaporation performance  
 145 as a function of calcination temperatures and structures. (b) Water content as a function of  
 146 calcination temperatures and structures. (c) Solar evaporation performance as a function of  
 147 calcination temperatures and structures. (d) Comparison of the net evaporation rate between HSI-  
 148 700 and VSI-700 with different thicknesses.

149

### 150 **S3. Water and salt transfer path identification**

151 Since HSI and HSN shared similar micro-unit but worked in different directions when compared  
152 to VSI, HSI and VSI with the same sickness of 6 mm were chosen to compare the water flux rate  
153 in them. The depth of both pure water and FeCl<sub>3</sub> solution were controlled at 2 mm to ensure that  
154 only bottom part of HSI and VSI are in direct touch with the liquids. Therefore, capillary flow is  
155 needed for liquids transport from the bottom of materials to their top surface. As depicted in Fig.  
156 S6, after soaking in pure water for 40 s, the bibulous paper in touch with the top surface of VSI  
157 started to become wet (Fig. S6a), which is clearer in FeCl<sub>3</sub> solution (Fig. S6b, c). Differently, for  
158 HSI, it only took 6 s for the liquids transport from the bottom of HSI to its top surface (Fig.  
159 S6e-f). This difference clearly demonstrated the water transport rate was much faster in vascular  
160 bundles, which was horizontal in VSI while vertical in HSI. Thus, water flux is mainly provided  
161 horizontally for VSI while vertically for HSI, which was later used as the proof for the two  
162 laminar flow inlets (Fig. 3a) for numerical simulation models.

163

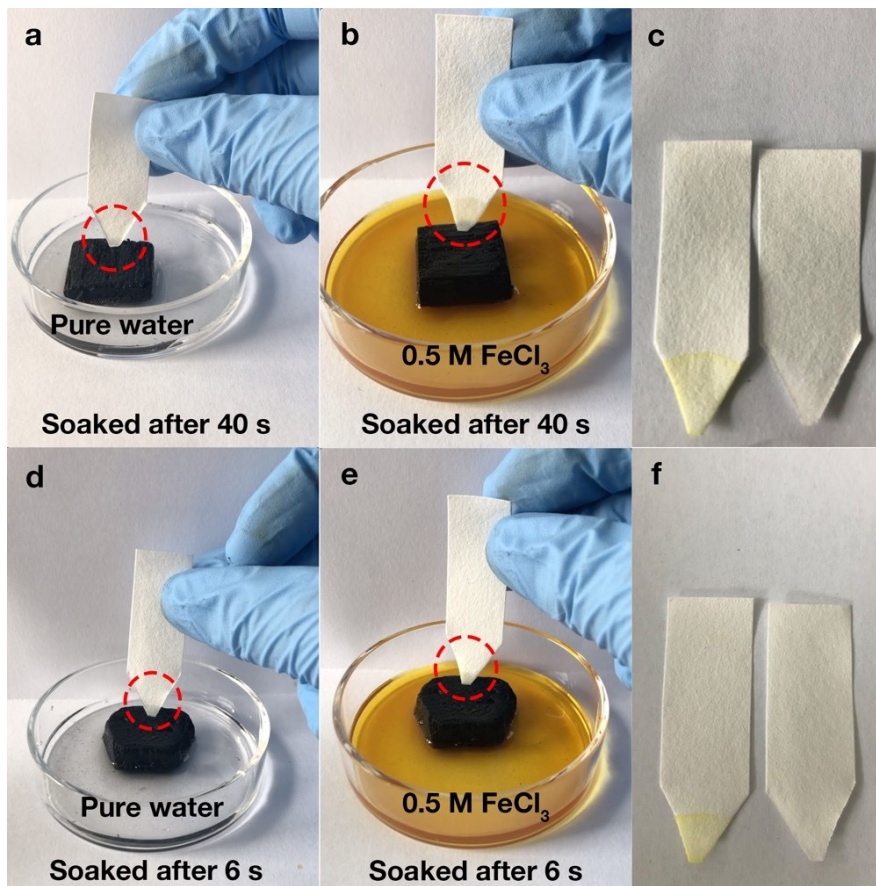

164

165 **Fig. S6** Digital photos of water flux direction test. (a-c) VSI soaked in pure water,  $\text{FeCl}_3$  solution,  
166 and the conditions of bibulous paper, respectively. (d-f) HSI soaked in pure water,  $\text{FeCl}_3$  solution,  
167 and the conditions of bibulous paper, respectively.

168

169

170

171

172

173

174 **S4. Numerical simulation setups**

175 To clearly illustrate the upper limit of heat and salt transfer in water path, one 3D model  
176 was set up. It was a simple unit with the same volume of water as HSI and VSI. It follows all the  
177 setups in ht and tds modules in numerical simulation setups. However, in spf module, no water  
178 velocity field was applied to rule out the impact of water flow.

179

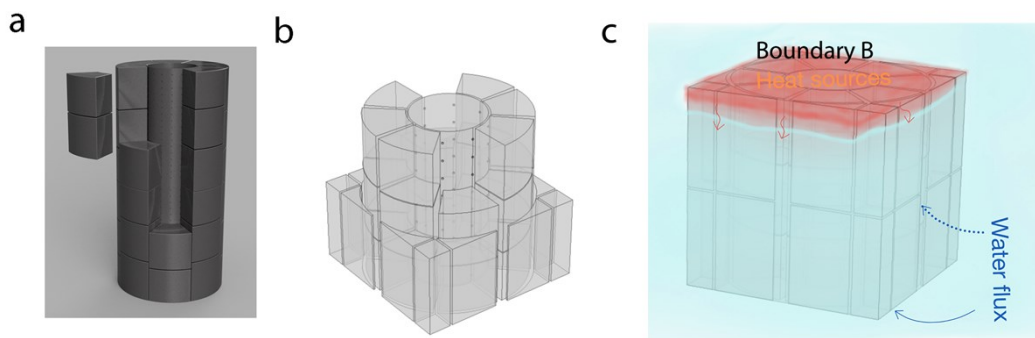

180

181 **Fig. S7** Geometric setups of finite simulation models. (a) Anisotropic structure of sugarcane  
182 based on SEM images. (b) Inner structure of the geometric model. (c) Schematic diagram of HSI  
183 model.

184

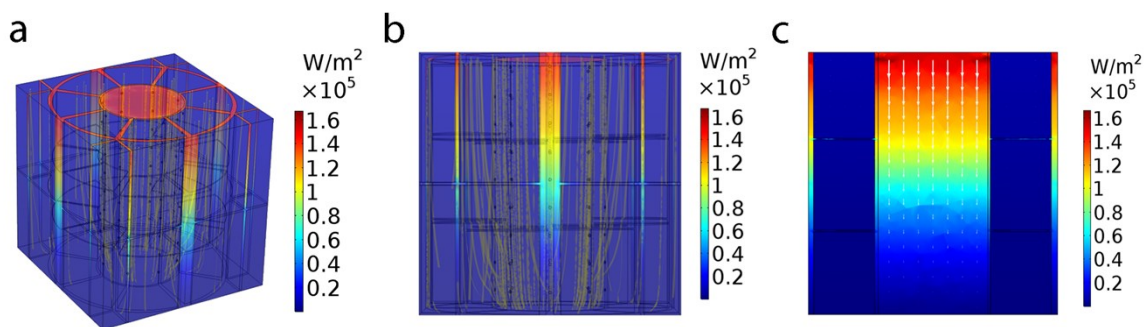

185

186 **Fig. S8** Schematic diagram of heat transfer process within HSI after 20 ms. (a, b) 3D (a) and  
187 profile (b) display (yellow lines represent heat flux distribution). (c) Profile display (white lines  
188 represent heat flux direction).

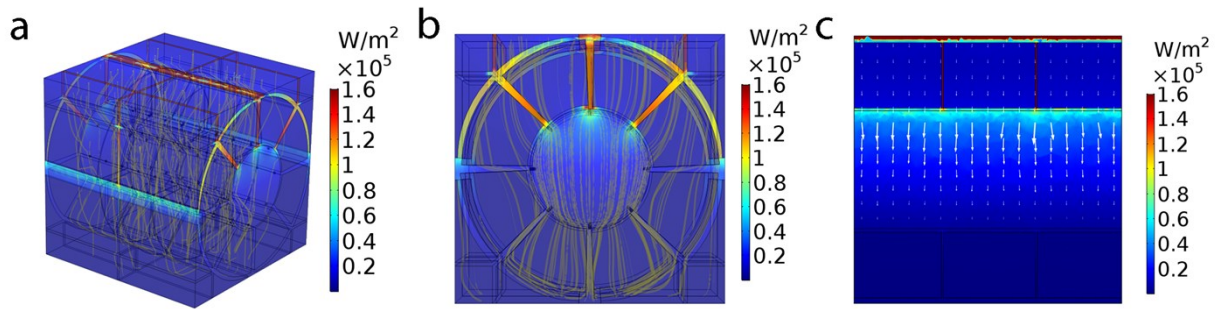

189

190 **Fig. S9** Schematic diagram of heat transfer process within VSI after 20 ms. (a, b) 3D (a) and  
 191 profile (b) display (yellow lines represent heat flux distribution). (c) Profile display (white lines  
 192 represent heat flux direction).

193

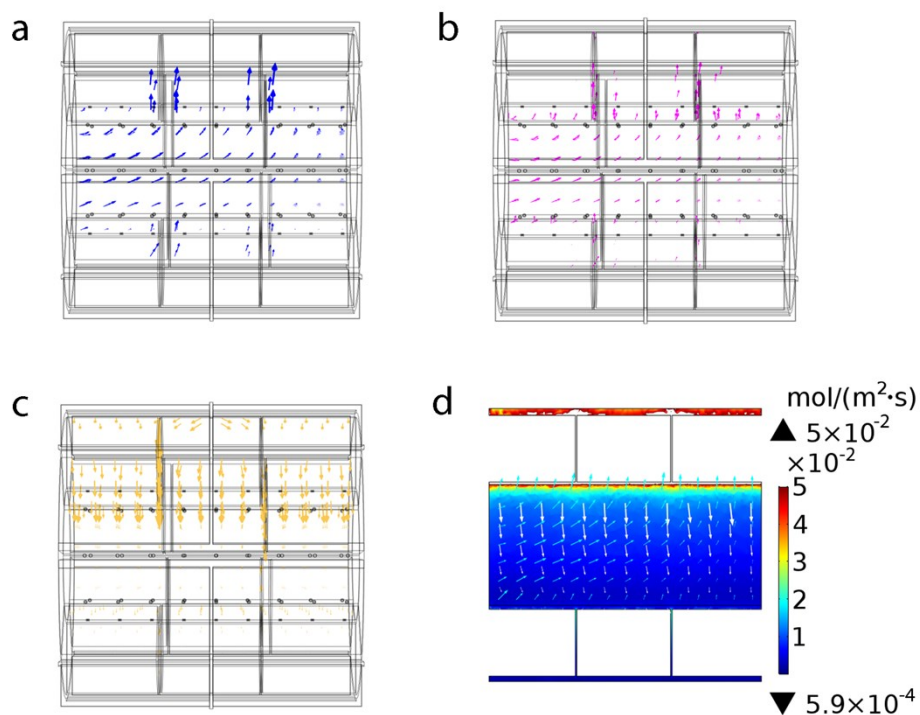

194

195 **Fig. S10** Schematic diagrams of the coupling between salt flux and water transportation in VSI.  
 196 (a) Streamlines of water transportation within VSI. (b) Streamlines of salt flux induced by  
 197 convection. (c) The Streamlines of salt flux induced by concentration diffusion. (d) Total salt  
 198 flux intensity in rainbow colors and total salt flux arrows after salt dispersion for 10 seconds.

199 **S5 Solar desalination**

200 **S5.1 Slat-rejecting property**

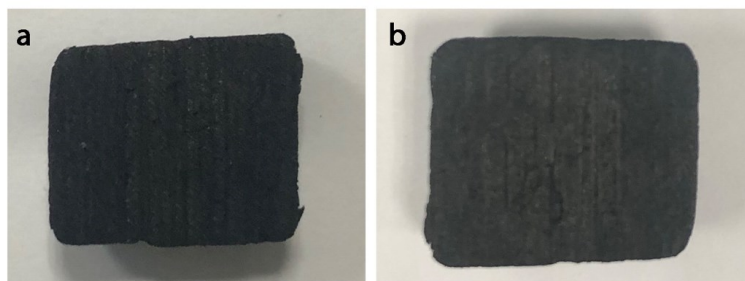

201

202 **Fig. S11** Images of VSI surface after 1-hr solar desalination under 2-sun (a) and 3-sun (b)

203 irradiance.

204

205

**Table S1 Literature Comparison**

| References                                      | Material Descriptions                        | Efficiency (%) |                        |                      |                     |
|-------------------------------------------------|----------------------------------------------|----------------|------------------------|----------------------|---------------------|
|                                                 |                                              | Direct Contact | Partial Direct Contact | Capillary Water Flow | Confined Water Flow |
| 2016<br>Nature Photonics <sup>7</sup>           | AAO single layer                             | <60            | -                      | -                    | -                   |
| 2015<br>Nature Communication <sup>8</sup>       | Thin-film black gold membranes               | <40            | -                      | -                    | -                   |
| 2017<br>Acs Nano <sup>9</sup>                   | Functionalized graphene membrane             | 48%            | -                      | -                    | -                   |
| 2016<br>Science Advances <sup>10</sup>          | Gold nanoparticles deposited on AAO membrane | 60-65          | -                      | -                    | -                   |
| 2017<br>Advanced Materials <sup>11</sup>        | 3D-printed CNT/GO layer & GO/NFC layer       | -              | -                      | -                    | 85.6                |
| 2018<br>Nature Nanotechnology <sup>4</sup>      | A hierarchically nanostructured gel          | -              | -                      | 94                   | -                   |
| 2018<br>Advanced Energy Materials <sup>12</sup> | Monolithic Hollow-Carbon-Nanotubes Aerogels  | -              | -                      | 86.8                 | -                   |
| 2017<br>Advanced Materials <sup>13</sup>        | Carbon of mushrooms                          | -              | -                      | 78                   | -                   |
| 2015<br>Advanced Materials <sup>14</sup>        | Porous Graphene                              | -              | -                      | 80                   | -                   |



|                                                                                                       |                                                            |   |      |       |       |
|-------------------------------------------------------------------------------------------------------|------------------------------------------------------------|---|------|-------|-------|
| 2018<br>Acs Nano <sup>15</sup>                                                                        | Porous Carbon Membranes                                    | - | -    | 74.69 | -     |
| 2018<br>Small <sup>16</sup>                                                                           | carbon nanotubes (CNTs) and fire-resistant inorganic paper | - | -    | 83.2  | -     |
| 2019<br>Journal of Materials Chemistry A <sup>17</sup>                                                | black gold nanoparticle-deposited sponge                   | - | -    | 80    | -     |
| 2019<br>Nano Energy <sup>18</sup>                                                                     | melamine-derived carbon sponges                            | - | -    | 69.7  | 92    |
| 2019<br>Advanced Materials <sup>19</sup>                                                              | artificial channel-array in a natural wood substrate       | - | 75.1 | -     | -     |
| 2019<br>Nano Energy <sup>20</sup>                                                                     | Bio-Derived Ultrathin Membrane                             | - | -    | 75-80 | -     |
| 2019<br>Acs Applied Materials & Interfaces <sup>2</sup>                                               | hollow glass microsphere-carbon black architecture         | - | -    | 82.1  | -     |
| 2018<br>Energy & Environmental Science <sup>21</sup>                                                  | A salt-rejecting floating solar still                      | - | 57   | -     | -     |
| 2017<br>Energy & Environmental Science <sup>22</sup>                                                  | a hybrid system for electricity generation                 | - | -    | -     | 73    |
| 2018<br>Energy & Environmental Science <sup>3</sup>                                                   | hydrogel-based antifouling solar evaporator                | - | -    | 95    | -     |
| 2017<br>Environmental Science & Technology <sup>23</sup>                                              | Graphene Oxide Leaf                                        | - | -    | -     | 80-85 |
| 2016<br>Proceedings of the National Academy of Sciences of the United States of America <sup>24</sup> | 2D water paths solar evaporator                            | - | -    | -     | 78-80 |
| 2017<br>Advanced Materials <sup>25</sup>                                                              | GO-based aerogels                                          | - | -    | 83    | -     |
| 2018<br>Advanced Energy Materials <sup>26</sup>                                                       | A flexible Janus absorber                                  | - | -    | 85    | -     |
| 2018<br>Advanced Functional Materials <sup>27</sup>                                                   | a geopolymer-biomass mesoporous carbon composite device    | - | -    | -     | 84.95 |

|                                                              |                                                                            |   |   |      |                   |
|--------------------------------------------------------------|----------------------------------------------------------------------------|---|---|------|-------------------|
| 2018<br>Advanced Energy<br>Materials <sup>5</sup>            | 3D polyurethane sponge                                                     | - | - | -    | 88                |
| 2014<br>Nature<br>Communication <sup>28</sup>                | A carbon foam supporting an<br>exfoliated graphite                         | - | - | 64   | -                 |
| 2017<br>Advanced Materials <sup>29</sup>                     | carbon nanotube (CNT)-<br>modified flexible wood<br>membrane (F-Wood/CNTs) | - | - | 65   | -                 |
| 2017<br>Journal of<br>Materials Chemistry<br>A <sup>30</sup> | Paper-based membranes on<br>silicone floaters                              | - | - | 80.6 | -                 |
| 2019<br>Advanced Materials <sup>31</sup>                     | MOF-Based Hierarchical<br>Structures                                       | - | - | -    | 96                |
| 2018<br>Advanced Energy<br>Materials <sup>32</sup>           | Solar Absorber Gel (Au)                                                    | - | - | 85   | -                 |
| 2016<br>Nature Energy <sup>33</sup>                          | floating structure with thermal<br>concentration                           | - | - | -    | ~89               |
| 2018<br>Nano Energy <sup>34</sup>                            | defect-abundant graphene<br>aerogel                                        | - | - | -    | 91                |
| 2017<br>National Science<br>Review <sup>35</sup>             | Three-dimensional artificial<br>transpiration                              | - | - | -    | 85                |
| 2018<br>Small Method <sup>36</sup>                           | Hydrophobic/Hydrophilic<br>Bifunctional Structure                          | - | - | -    | 82                |
| 2020<br>Desalination <sup>37</sup>                           | printed paper-based solar<br>absorber                                      | - | - | -    | ~78%<br>(1.1 sun) |

206 (Notice: Text in red means literatures reporting salt-rejecting property.)

207

208

209

210

211

212

213

214

215



217 **References**

- 218 1. S. Wu, G. Xiong, H. Yang, B. Gong, Y. Tian, C. Xu, Y. Wang, T. Fisher, J. Yan, K. Cen, T. Luo, X. Tu, Z.  
219 Bo and K. Ostrikov, *Adv. Energy Mater.*, 2019, **0**, 1901286-1901297.
- 220 2. W. Zhang, G. Zhang, Q. Ji, H. Liu, R. Liu and J. Qu, *Acs Appl. Mater. Interfaces*, 2019, **11**, 9974-9983.
- 221 3. X. Zhou, F. Zhao, Y. Guo, Y. Zhang and G. Yu, *Energy Environ. Sci.*, 2018, **11**, 1985-1992.
- 222 4. F. Zhao, X. Zhou, Y. Shi, X. Qian, M. Alexander, X. Zhao, S. Mendez, R. Yang, L. Qu and G. Yu, *Nat.*  
223 *Nanotechnol.*, 2018, **13**, 489-495.
- 224 5. L. Zhu, M. Gao, C. K. N. Peh, X. Wang and G. W. Ho, *Adv. Energy Mater.*, 2018, **8**, 1702149-1702156.
- 225 6. J. Zeng, Q. Wang, Y. Shi, P. Liu and R. Chen, *Adv. Energy Mater.*, 2019, **9**.
- 226 7. L. Zhou, Y. Tan, J. Wang, W. Xu, Y. Yuan, W. Cai, S. Zhu and J. Zhu, *Nat. Photonics*, 2016, **10**, 393-398.
- 227 8. K. Bae, G. Kang, S. K. Cho, W. Park, K. Kim and W. J. Padilla, *Nat. Commun.*, 2015, **6**, 10103.
- 228 9. J. Yang, Y. Pang, W. Huang, S. K. Shaw, J. Schiffbauer, M. A. Pillers, X. Mu, S. Luo, T. Zhang and Y.  
229 Huang, *Acs Nano*, 2017, **11**, 5510-5518.
- 230 10. L. Zhou, Y. Tan, D. Ji, B. Zhu, P. Zhang, J. Xu, Q. Gan, Z. Yu and J. Zhu, *Sci. Adv.*, 2016, **2**, e1501227.
- 231 11. Y. Li, T. Gao, Z. Yang, C. Chen, W. Luo, J. Song, E. Hitz, C. Jia, Y. Zhou and B. Liu, *Adv. Mater.*, 2017, **29**,  
232 1700981-1700988.
- 233 12. P. Mu, Z. Zhang, W. Bai, J. He, H. Sun, Z. Zhu, W. Liang and A. Li, *Adv. Energy Mater.*, 2018, **9**, 1802158-  
234 1802166.
- 235 13. N. Xu, X. Hu, W. Xu, X. Li, L. Zhou, S. Zhu and J. Zhu, *Adv. Mater.*, 2017, **29**, 1606762-1606766.
- 236 14. Y. Ito, Y. Tanabe, J. Han, T. Fujita, K. Tanigaki and M. Chen, *Adv. Mater.*, 2015, **27**, 4302-4307.
- 237 15. Y. Shao, Z. Jiang, Y. Zhang, T. Wang, P. Zhao, Z. Zhang, J. Yuan and H. Wang, *ACS Nano*, 2018, **12**,  
238 11704-11710.
- 239 16. Z. C. Xiong, Y. J. Zhu, D. D. Qin, F. F. Chen and R. L. Yang, *Small*, 2018, **14**, e1803387-1803399.
- 240 17. Y. Liu, Z. Liu, Q. Huang, X. Liang, X. Zhou, H. Fu, Q. Wu, J. Zhang and W. Xie, *J. Mater. Chem. A*, 2019,  
241 **7**, 2581-2588.
- 242 18. F. Gong, H. Li, W. Wang, J. Huang, D. Xia, J. Liao, M. Wu and D. V. Papavassiliou, *Nano Energy*, 2019, **58**,  
243 322-330.
- 244 19. Y. Kuang, C. Chen, S. He, E. M. Hitz, Y. Wang, W. Gan, R. Mi and L. Hu, *Adv. Mater.*, 2019, DOI:  
245 10.1002/adma.201900498, e1900498-1900506.
- 246 20. X. Han, W. Wang, K. Zuo, L. Chen, L. Yuan, J. Liang, Q. Li, P. M. Ajayan, Y. Zhao and J. Lou, *Nano*  
247 *Energy*, 2019, **60**, 567-575.
- 248 21. G. Ni, S. H. Zandavi, S. M. Javid, S. V. Boriskina, T. A. Cooper and G. Chen, *Energy Environ. Sci.*, 2018,  
249 **11**, 1510-1519
- 250 22. P. Yang, K. Liu, Q. Chen, J. Li, J. Duan, G. Xue, Z. Xu, W. Xie and J. Zhou, *Energy Environ. Sci.*, 2017, **10**,  
251 1923-1927.
- 252 23. C. Finnerty, L. Zhang, D. L. Sedlak, K. L. Nelson and B. Mi, *Environ. Sci. Technol.*, 2017, **51**, 11701-  
253 11709.
- 254 24. X. Li, W. Xu, M. Tang, L. Zhou, B. Zhu, S. Zhu and J. Zhu, *Proc. Natl. Acad. Sci. U. S. A.*, 2016, **113**,  
255 13953-13958.
- 256 25. X. Hu, W. Xu, L. Zhou, Y. Tan, Y. Wang, S. Zhu and J. Zhu, *Adv. Mater.*, 2017, **29**, 1604031-1604035.
- 257 26. W. Xu, X. Hu, S. Zhuang, Y. Wang, X. Li, L. Zhou, S. Zhu and J. Zhu, *Adv. Energy Mater.*, 2018, **8**,  
258 1702884-1702890.

- 259 27. F. Liu, B. Zhao, W. Wu, H. Yang, Y. Ning, Y. Lai and R. Bradley, *Adv. Funct. Mater.*, 2018, **28**, 1803266-  
260 1803276.
- 261 28. H. Ghasemi, G. Ni, A. M. Marconnet, J. Loomis, S. Yerci, N. Miljkovic and G. Chen, *Nat. Commun.*, 2014,  
262 **5**, 4449-4455.
- 263 29. C. Chen, Y. Li, J. Song, Z. Yang, Y. Kuang, E. Hitz, C. Jia, A. Gong, F. Jiang and J. Y. Zhu, *Adv. Mater.*,  
264 2017, **29**, 1701756-1701763.
- 265 30. Z. Wang, Q. Ye, X. Liang, J. Xu, C. Chang, C. Song, W. Shang, J. Wu, P. Tao and T. Deng, *J. Mater. Chem.*  
266 *A*, 2017, **5**, 16359-16368.
- 267 31. Q. Ma, P. Yin, M. Zhao, Z. Luo, Y. Huang, Q. He, Y. Yu, Z. Liu, Z. Hu, B. Chen and H. Zhang, *Adv. Mater.*,  
268 2019, DOI: 10.1002/adma.201808249, e1808249-1808256.
- 269 32. M. Gao, C. K. Peh, H. T. Phan, L. Zhu and G. W. Ho, *Adv. Energy Mater.*, 2018, **8**, 1800711-1800720.
- 270 33. G. Ni, G. Li, S. V. Boriskina, H. Li, W. Yang, T. J. Zhang and G. Chen, *Nat. Energy*, 2016, **1**, 16126-16132.
- 271 34. P. Zhang, Q. Liao, T. Zhang, H. Cheng, Y. Huang, C. Yang, C. Li, L. Jiang and L. Qu, *Nano Energy*, 2018,  
272 **46**, 415-422.
- 273 35. X. Li, R. Lin, G. Ni, N. Xu, X. Hu, B. Zhu, G. Lv, J. Li, S. Zhu and J. Zhu, *National Science Review*, 2017,  
274 **5**, 70-77.
- 275 36. T. Gao, Y. Li, C. Chen, Z. Yang, Y. Kuang, C. Jia, J. Song, E. M. Hitz, B. Liu, H. Huang, J. Yu, B. Yang and  
276 L. Hu, *Small Methods*, 2019, **3**, 1800176-1800184.
- 277 37. J. Xu, Z. Wang, C. Chang, B. Fu, P. Tao, C. Song, W. Shang and T. Deng, *Desalination*, 2020, **484**.

278

279
